# Supplementary material
Source: PubMed Central journal article supplement (PMC7528848)
Supplement: mmc1.pdf [file mmc1.pdf]

| Country            | Active cases as of August 30, 2020 | Population | Prevalence of active cases | Can schools fully reopen? | Can schools reopen with restricted, blended models? |
|--------------------|------------------------------------|------------|----------------------------|---------------------------|-----------------------------------------------------|
| USA                | 2,557,160                          | 331319877  | 7.72E-03                   | N                         | N                                                   |
| Brazil             | 720,381                            | 212805498  | 3.39E-03                   | N                         | Y                                                   |
| India              | 781,040                            | 1382196924 | 5.65E-04                   | N                         | Y                                                   |
| Russia             | 166,251                            | 145944843  | 1.14E-03                   | N                         | Y                                                   |
| Peru               | 164,153                            | 33045190   | 4.97E-03                   | N                         | Y                                                   |
| South Africa       | 71,876                             | 59428553   | 1.21E-03                   | N                         | Y                                                   |
| Colombia           | 140,276                            | 50970324   | 2.75E-03                   | N                         | Y                                                   |
| Mexico             | 118,766                            | 129151233  | 9.20E-04                   | N                         | Y                                                   |
| Chile              | 16,146                             | 19142814   | 8.43E-04                   | N                         | Y                                                   |
| Argentina          | 98,831                             | 45262921   | 2.18E-03                   | N                         | Y                                                   |
| Iran               | 30,687                             | 84165180   | 3.65E-04                   | N                         | Y                                                   |
| Saudi Arabia       | 21,284                             | 34900013   | 6.10E-04                   | N                         | Y                                                   |
| Bangladesh         | 104,667                            | 164954430  | 6.35E-04                   | N                         | Y                                                   |
| Pakistan           | 8,801                              | 221565832  | 3.97E-05                   | Y                         | Y                                                   |
| Spain              | 289,000                            | 46940000   | 6.16E-03                   | N                         | N                                                   |
| France             | 161,160                            | 65297356   | 2.47E-03                   | N                         | Y                                                   |
| Turkey             | 18,381                             | 84485330   | 2.18E-04                   | N                         | Y                                                   |
| Italy              | 24,205                             | 60447003   | 4.00E-04                   | N                         | Y                                                   |
| Germany            | 16,170                             | 83828051   | 1.93E-04                   | N                         | Y                                                   |
| UK                 | 297,162                            | 67,943,420 | 4.37E-03                   | N                         | Y                                                   |
| Iraq               | 51,338                             | 40362883   | 1.27E-03                   | N                         | Y                                                   |
| Philippines        | 56,473                             | 109814383  | 5.14E-04                   | N                         | Y                                                   |
| Indonesia          | 40,525                             | 273990013  | 1.48E-04                   | N                         | Y                                                   |
| Canada             | 5,160                              | 37795794   | 1.37E-04                   | N                         | Y                                                   |
| Ukraine            | 59,813                             | 43689434   | 1.37E-03                   | N                         | Y                                                   |
| Qatar              | 2,948                              | 2807805    | 1.05E-03                   | N                         | Y                                                   |
| Bolivia            | 53,667                             | 11698467   | 4.59E-03                   | N                         | Y                                                   |
| Israel             | 38,016                             | 9197590    | 4.13E-03                   | N                         | Y                                                   |
| Ecuador            | 5,473                              | 17685670   | 3.09E-04                   | N                         | Y                                                   |
| Kazakhstan         | 8,026                              | 18812777   | 4.27E-04                   | N                         | Y                                                   |
| Egypt              | 21,819                             | 102638000  | 2.13E-04                   | N                         | Y                                                   |
| Dominican Republic | 25,784                             | 10865479   | 2.37E-03                   | N                         | Y                                                   |
| Panama             | 24,235                             | 4325553    | 5.60E-03                   | N                         | N                                                   |
| Romania            | 45,542                             | 19216003   | 2.37E-03                   | N                         | Y                                                   |
| Oman               | 4,408                              | 5126634    | 8.60E-04                   | N                         | Y                                                   |
| China              | 244                                | 1439323776 | 1.70E-07                   | Y                         | Y                                                   |
| Kuwait             | 7,456                              | 4280629    | 1.74E-03                   | N                         | Y                                                   |
| Belgium            | 56,305                             | 11597901   | 4.85E-03                   | N                         | Y                                                   |
| Guatemala          | 9,788                              | 17967755   | 5.45E-04                   | N                         | Y                                                   |

|                        |        |           |          |   |   |
|------------------------|--------|-----------|----------|---|---|
| Belarus                | 559    | 9448806   | 5.92E-05 | N | Y |
| UAE                    | 8,708  | 9909587   | 8.79E-04 | N | Y |
| Poland                 | 18,645 | 37839707  | 4.93E-04 | N | Y |
| Japan                  | 9,827  | 126411635 | 7.77E-05 | N | Y |
| Morocco                | 13,933 | 36980844  | 3.77E-04 | N | Y |
| Honduras               | 47,647 | 9929610   | 4.80E-03 | N | Y |
| Portugal               | 14,064 | 10191733  | 1.38E-03 | N | Y |
| Singapore              | 1,158  | 5857819   | 1.98E-04 | N | Y |
| Nigeria                | 11,402 | 206928340 | 5.51E-05 | N | Y |
| Bahrain                | 2,927  | 1710407   | 1.71E-03 | N | Y |
| Ethiopia               | 31,947 | 115403228 | 2.77E-04 | N | Y |
| Venezuela              | 8,396  | 28422458  | 2.95E-04 | N | Y |
| Ghana                  | 1,152  | 31174325  | 3.70E-05 | Y | Y |
| Kyrgyzstan             | 4,564  | 6541249   | 6.98E-04 | N | Y |
| Algeria                | 11,573 | 43975904  | 2.63E-04 | N | Y |
| Armenia                | 5,223  | 2964158   | 1.76E-03 | N | Y |
| Switzerland            | 4,209  | 8664924   | 4.86E-04 | N | Y |
| Uzbekistan             | 2,456  | 33546521  | 7.32E-05 | N | Y |
| Costa Rica             | 23,544 | 5101650   | 4.61E-03 | N | Y |
| Nepal                  | 17,518 | 29219461  | 6.00E-04 | N | Y |
| Afghanistan            | 7,671  | 39064675  | 1.96E-04 | N | Y |
| Moldova                | 10,569 | 4032396   | 2.62E-03 | N | Y |
| Azerbaijan             | 2,075  | 10153980  | 2.04E-04 | N | Y |
| Kenya                  | 13,795 | 53955764  | 2.56E-04 | N | Y |
| Serbia                 | 723    | 8731464   | 8.28E-05 | N | Y |
| Ireland                | 3,619  | 4946665   | 7.32E-04 | N | Y |
| Austria                | 3,363  | 9014800   | 3.73E-04 | N | Y |
| Australia              | 3,943  | 25547450  | 1.54E-04 | N | Y |
| El Salvador            | 10,909 | 6491566   | 1.68E-03 | N | Y |
| Czechia                | 6,229  | 10712264  | 5.81E-04 | N | Y |
| Palestine              | 7,265  | 5119812   | 1.42E-03 | N | Y |
| Bosnia and Herzegovina | 6,234  | 3277374   | 1.90E-03 | N | Y |
| S. Korea               | 4,473  | 51276496  | 8.72E-05 | N | Y |
| Cameroon               | 1,080  | 26647839  | 4.05E-05 | Y | Y |
| Ivory Coast            | 1,338  | 26479122  | 5.05E-05 | N | Y |
| Denmark                | 1,151  | 5795557   | 1.99E-04 | N | Y |
| Lebanon                | 12,017 | 6820309   | 1.76E-03 | N | Y |
| Paraguay               | 7,326  | 7146595   | 1.03E-03 | N | Y |
| Bulgaria               | 4,306  | 6939586   | 6.20E-04 | N | Y |
| Madagascar             | 850    | 27800589  | 3.06E-05 | Y | Y |
| North Macedonia        | 2,668  | 2083360   | 1.28E-03 | N | Y |
| Senegal                | 3,884  | 16811700  | 2.31E-04 | N | Y |
| Libya                  | 11,781 | 6886226   | 1.71E-03 | N | Y |
| Sudan                  | 5,754  | 44008044  | 1.31E-04 | N | Y |

|                      |       |          |          |   |   |
|----------------------|-------|----------|----------|---|---|
| Zambia               | 284   | 18462608 | 1.54E-05 | Y | Y |
| Norway               | 1,019 | 5428131  | 1.88E-04 | N | Y |
| Greece               | 6,068 | 10414489 | 5.83E-04 | N | Y |
| Croatia              | 2,727 | 4100994  | 6.65E-04 | N | Y |
| DRC                  | 684   | 89974062 | 7.60E-06 | Y | Y |
| Albania              | 3,961 | 2877274  | 1.38E-03 | N | Y |
| Malaysia             | 160   | 32432431 | 4.93E-06 | Y | Y |
| Guinea               | 910   | 13187372 | 6.90E-05 | N | Y |
| French Guiana        | 398   | 299873   | 1.33E-03 | N | Y |
| Tajikistan           | 1,139 | 9570963  | 1.19E-04 | N | Y |
| Gabon                | 1,265 | 2233873  | 5.66E-04 | N | Y |
| Haiti                | 2,180 | 11424837 | 1.91E-04 | N | Y |
| Finland              | 542   | 5542144  | 9.78E-05 | N | Y |
| Maldives             | 2,603 | 542047   | 4.80E-03 | N | Y |
| Namibia              | 4,230 | 2548160  | 1.66E-03 | N | Y |
| Luxembourg           | 646   | 627788   | 1.03E-03 | N | Y |
| Mauritania           | 447   | 4668434  | 9.57E-05 | N | Y |
| Zimbabwe             | 1,154 | 14897405 | 7.75E-05 | N | Y |
| Hungary              | 1,588 | 9656250  | 1.64E-04 | N | Y |
| Malawi               | 2,211 | 19206005 | 1.15E-04 | N | Y |
| Djibouti             | 6     | 990290   | 6.06E-06 | Y | Y |
| Equatorial<br>Guinea | 974   | 1409913  | 6.91E-04 | N | Y |
| Hong Kong            | 394   | 7506859  | 5.25E-05 | N | Y |
| Montenegro           | 795   | 628079   | 1.27E-03 | N | Y |
| CAR                  | 2,855 | 4843035  | 5.90E-04 | N | Y |
| Eswatini             | 1,060 | 1162102  | 9.12E-04 | N | Y |
| Nicaragua            | 1,444 | 6637214  | 2.18E-04 | N | Y |
| Congo                | 2,159 | 5539067  | 3.90E-04 | N | Y |
| Cuba                 | 552   | 11325466 | 4.87E-05 | Y | Y |
| Suriname             | 896   | 587484   | 1.53E-03 | N | Y |
| Slovakia             | 1,565 | 5460081  | 2.87E-04 | N | Y |
| Rwanda               | 1,923 | 13001784 | 1.48E-04 | N | Y |
| Mozambique           | 1,698 | 31389204 | 5.41E-05 | N | Y |
| Cabo Verde           | 884   | 556960   | 1.59E-03 | N | Y |
| Tunisia              | 1,960 | 11838567 | 1.66E-04 | N | Y |
| Thailand             | 101   | 69828870 | 1.45E-06 | Y | Y |
| Somalia              | 732   | 15960984 | 4.59E-05 | Y | Y |
| Mayotte              | 297   | 273833   | 1.08E-03 | N | Y |
| Sri Lanka            | 140   | 21427991 | 6.53E-06 | Y | Y |
| Uganda               | 1,610 | 45959067 | 3.50E-05 | Y | Y |
| Gambia               | 2,048 | 2427037  | 8.44E-04 | N | Y |
| Lithuania            | 951   | 2715752  | 3.50E-04 | N | Y |
| Slovenia             | 449   | 2078985  | 2.16E-04 | N | Y |
| Mali                 | 510   | 20339705 | 2.51E-05 | Y | Y |
| Syria                | 1,980 | 17566394 | 1.13E-04 | N | Y |

|                       |       |          |          |   |   |
|-----------------------|-------|----------|----------|---|---|
| Angola                | 1,403 | 33020849 | 4.25E-05 | Y | Y |
| South Sudan           | 1,182 | 11214816 | 1.05E-04 | N | Y |
| Estonia               | 221   | 1326683  | 1.67E-04 | N | Y |
| Guinea-Bissau         | 1,044 | 1975208  | 5.29E-04 | N | Y |
| Benin                 | 367   | 12171998 | 3.02E-05 | Y | Y |
| Bahamas               | 1,303 | 393852   | 3.31E-03 | N | Y |
| Jamaica               | 1,203 | 2963288  | 4.06E-04 | N | Y |
| Iceland               | 105   | 341604   | 3.07E-04 | N | Y |
| Sierra Leone          | 358   | 8002382  | 4.47E-05 | Y | Y |
| Aruba                 | 1,200 | 106840   | 1.12E-02 | N | N |
| Jordan                | 483   | 10219498 | 4.73E-05 | Y | Y |
| Yemen                 | 266   | 29928272 | 8.89E-06 | Y | Y |
| Malta                 | 538   | 441737   | 1.22E-03 | N | Y |
| New Zealand           | 137   | 5002100  | 2.74E-05 | Y | Y |
| Trinidad and Tobago   | 990   | 1400234  | 7.07E-04 | N | Y |
| Réunion               | 748   | 896353   | 8.34E-04 | N | Y |
| Botswana              | 1,403 | 2359065  | 5.95E-04 | N | Y |
| Uruguay               | 162   | 3475711  | 4.66E-05 | Y | Y |
| Cyprus                | 532   | 1208790  | 4.40E-04 | N | Y |
| Georgia               | 229   | 3987889  | 5.74E-05 | N | Y |
| Latvia                | 196   | 1882635  | 1.04E-04 | N | Y |
| Togo                  | 373   | 8308808  | 4.49E-05 | Y | Y |
| Burkina Faso          | 244   | 20991005 | 1.16E-05 | Y | Y |
| Liberia               | 350   | 5076108  | 6.90E-05 | N | Y |
| Guyana                | 513   | 787174   | 6.52E-04 | N | Y |
| Niger                 | 21    | 24336834 | 8.63E-07 | Y | Y |
| Guadeloupe            | 793   | 400135   | 1.98E-03 | N | Y |
| Andorra               | 169   | 77285    | 2.19E-03 | N | Y |
| Lesotho               | 526   | 2145008  | 2.45E-04 | N | Y |
| Vietnam               | 313   | 97480451 | 3.21E-06 | Y | Y |
| Chad                  | 57    | 16497705 | 3.46E-06 | Y | Y |
| Belize                | 836   | 398766   | 2.10E-03 | N | Y |
| Sao Tome and Principe | 32    | 219800   | 1.46E-04 | N | Y |
| Myanmar               | 417   | 54469273 | 7.66E-06 | Y | Y |
| San Marino            | 10    | 33943    | 2.95E-04 | N | Y |
| Channel Islands       | 32    | 174122   | 1.84E-04 | N | Y |
| Martinique            | 482   | 375217   | 1.28E-03 | N | Y |
| Tanzania              | 305   | 59993731 | 5.08E-06 | Y | Y |
| Turks and Caicos      | 339   | 38801    | 8.74E-03 | N | N |
| Taiwan                | 19    | 23823899 | 7.98E-07 | Y | Y |
| French Polynesia      | 280   | 281173   | 9.96E-04 | N | Y |

|                        |         |            |          |   |   |
|------------------------|---------|------------|----------|---|---|
| Sint Maarten           | 264     | 42954      | 6.15E-03 | N | N |
| Papua New Guinea       | 222     | 8973676    | 2.47E-05 | Y | Y |
| Burundi                | 87      | 11944567   | 7.28E-06 | Y | Y |
| Comoros                | 17      | 872493     | 1.95E-05 | Y | Y |
| Faeroe Islands         | 49      | 48894      | 1.00E-03 | N | Y |
| Mauritius              | 10      | 1272117    | 7.86E-06 | Y | Y |
| Eritrea                | 34      | 3554260    | 9.57E-06 | Y | Y |
| Mongolia               | 6       | 3286664    | 1.83E-06 | Y | Y |
| Gibraltar              | 57      | 33689      | 1.69E-03 | N | Y |
| Cambodia               | 8       | 16755919   | 4.77E-07 | Y | Y |
| Saint Martin           | 129     | 38770      | 3.33E-03 | N | Y |
| Cayman Islands         | 2       | 65846      | 3.04E-05 | Y | Y |
| Bhutan                 | 60      | 772976     | 7.76E-05 | N | Y |
| Barbados               | 22      | 287433     | 7.65E-05 | N | Y |
| Bermuda                | 7       | 62239      | 1.12E-04 | N | Y |
| Brunei                 | 2       | 438156     | 4.56E-06 | Y | Y |
| Seychelles             | 9       | 98446      | 9.14E-05 | N | Y |
| Monaco                 | 40      | 39287      | 1.02E-03 | N | Y |
| Liechtenstein          | 9       | 38146      | 2.36E-04 | N | Y |
| Curaçao                | 31      | 164203     | 1.89E-04 | N | Y |
| St. Vincent Grenadines | 3       | 110998     | 2.70E-05 | Y | Y |
| British Virgin Islands | 26      | 30264      | 8.59E-04 | N | Y |
| Fiji                   | 3       | 897503     | 3.34E-06 | Y | Y |
| Timor-Leste            | 2       | 1322393    | 1.51E-06 | Y | Y |
| Saint Lucia            | 1       | 183765     | 5.44E-06 | Y | Y |
|                        |         |            |          |   |   |
|                        |         | Max        | 1.12E-02 |   |   |
|                        |         | Min        | 1.70E-07 |   |   |
|                        |         |            |          |   |   |
|                        |         |            |          |   |   |
|                        |         |            |          |   |   |
|                        |         |            |          |   |   |
| USA                    | Active  |            |          |   |   |
| State                  | Cases   | Population |          |   |   |
| Alabama                | 75,045  | 4,903,185  | 1.53E-02 | N | N |
| Alaska                 | 3,150   | 731,545    | 4.31E-03 | N | Y |
| Arizona                | 166,092 | 7,278,717  | 2.28E-02 | N | N |
| Arkansas               | 5,664   | 3,017,804  | 1.88E-03 | N | Y |
| California             | 369,670 | 39,512,223 | 9.36E-03 | N | N |
| Colorado               | 30,319  | 5,758,736  | 5.26E-03 | N | N |
| Connecticut            | 10,918  | 3,565,287  | 3.06E-03 | N | Y |
| Delaware               | 7,421   | 973,764    | 7.62E-03 | N | N |

|                      |         |            |          |   |   |
|----------------------|---------|------------|----------|---|---|
| District Of Columbia | 2,266   | 705,749    | 3.21E-03 | N | Y |
| Florida              | 534,193 | 21,477,737 | 2.49E-02 | N | N |
| Georgia              | 214,786 | 10,617,423 | 2.02E-02 | N | N |
| Hawaii               | 5,756   | 1,415,872  | 4.07E-03 | N | Y |
| Idaho                | 16,796  | 1,787,065  | 9.40E-03 | N | N |
| Illinois             | 74,468  | 12,671,821 | 5.88E-03 | N | N |
| Indiana              | 19,488  | 6,732,219  | 2.89E-03 | N | Y |
| Iowa                 | 16,597  | 3,155,070  | 5.26E-03 | N | N |
| Kansas               | 15,046  | 2,913,314  | 5.16E-03 | N | N |
| Kentucky             | 36,774  | 4,467,673  | 8.23E-03 | N | N |
| Louisiana            | 15,018  | 4,648,794  | 3.23E-03 | N | Y |
| Maine                | 470     | 1,344,212  | 3.50E-04 | N | Y |
| Maryland             | 97,915  | 6,045,680  | 1.62E-02 | N | N |
| Massachusetts        | 15,260  | 6,892,503  | 2.21E-03 | N | Y |
| Michigan             | 29,627  | 9,986,857  | 2.97E-03 | N | Y |
| Minnesota            | 6,408   | 5,639,632  | 1.14E-03 | N | Y |
| Mississippi          | 17,528  | 2,976,149  | 5.89E-03 | N | N |
| Missouri             | 69,318  | 6,137,428  | 1.13E-02 | N | N |
| Montana              | 1,953   | 1,068,778  | 1.83E-03 | N | Y |
| Nebraska             | 7,685   | 1,934,408  | 3.97E-03 | N | Y |
| Nevada               | 41,595  | 3,080,156  | 1.35E-02 | N | N |
| New Hampshire        | 222     | 1,359,711  | 1.63E-04 | N | Y |
| New Jersey           | 19,461  | 8,882,190  | 2.19E-03 | N | Y |
| New Mexico           | 11,600  | 2,096,829  | 5.53E-03 | N | N |
| New York             | 62,036  | 19,453,561 | 3.19E-03 | N | Y |
| North Carolina       | 27,270  | 10,488,084 | 2.60E-03 | N | Y |
| North Dakota         | 2,481   | 762,062    | 3.26E-03 | N | Y |
| Ohio                 | 16,312  | 11,689,100 | 1.40E-03 | N | Y |
| Oklahoma             | 8,288   | 3,956,971  | 2.09E-03 | N | Y |
| Oregon               | 21,212  | 4,217,737  | 5.03E-03 | N | N |
| Pennsylvania         | 20,907  | 12,801,989 | 1.63E-03 | N | Y |
| Rhode Island         | 18,553  | 1,059,361  | 1.75E-02 | N | N |
| South Carolina       | 64,184  | 5,148,714  | 1.25E-02 | N | N |
| South Dakota         | 2,644   | 884,659    | 2.99E-03 | N | Y |
| Tennessee            | 36,599  | 6,829,174  | 5.36E-03 | N | N |
| Texas                | 110,009 | 28,995,881 | 3.79E-03 | N | Y |
| Utah                 | 7,723   | 3,205,958  | 2.41E-03 | N | Y |
| Vermont              | 137     | 623,989    | 2.20E-04 | N | Y |
| Virginia             | 102,179 | 8,535,519  | 1.20E-02 | N | N |
| Washington           | 45,677  | 7,614,893  | 6.00E-03 | N | N |
| West Virginia        | 1,914   | 1,792,147  | 1.07E-03 | N | Y |
| Wisconsin            | 7,516   | 5,822,434  | 1.29E-03 | N | Y |
| Wyoming              | 647     | 578,759    | 1.12E-03 | N | Y |
|                      |         |            |          |   |   |
